# Supplementary material for: An ambient process for hole transport layer-free highly stable MAPbI3 by addition of MACl for efficient perovskite solar cells
Source: Royal Society of Chemistry journal article supplement (doi:10.1039/d3ya00500c), 2024-01-01
Supplement: d3ya00500c1.pdf [file d3ya00500c1.pdf]

## Supporting Information

### **An ambient process for hole transport layer free highly stable MAPbI<sub>3</sub> by addition of MACl for efficient perovskite solar cells**

*Pardhasaradhi Nandigana,<sup>a,b</sup> Bavatharini Saminathan,<sup>a</sup> Sriram P.,<sup>a,b</sup> Sujatha D.,<sup>a,b</sup> Imthiaz  
Ahmed M.,<sup>a</sup> Ram Prasanth R.,<sup>a</sup> B Subramanian<sup>a,b</sup> and Subhendu K. Panda <sup>a,b\*</sup>*

*[a] EMF Division, CSIR – Central Electrochemical Research Institute, Karaikudi, Tamil Nadu  
630003, India.*

*[b] Academy of Scientific and Innovative Research (AcSIR), Ghaziabad-201002, India.*

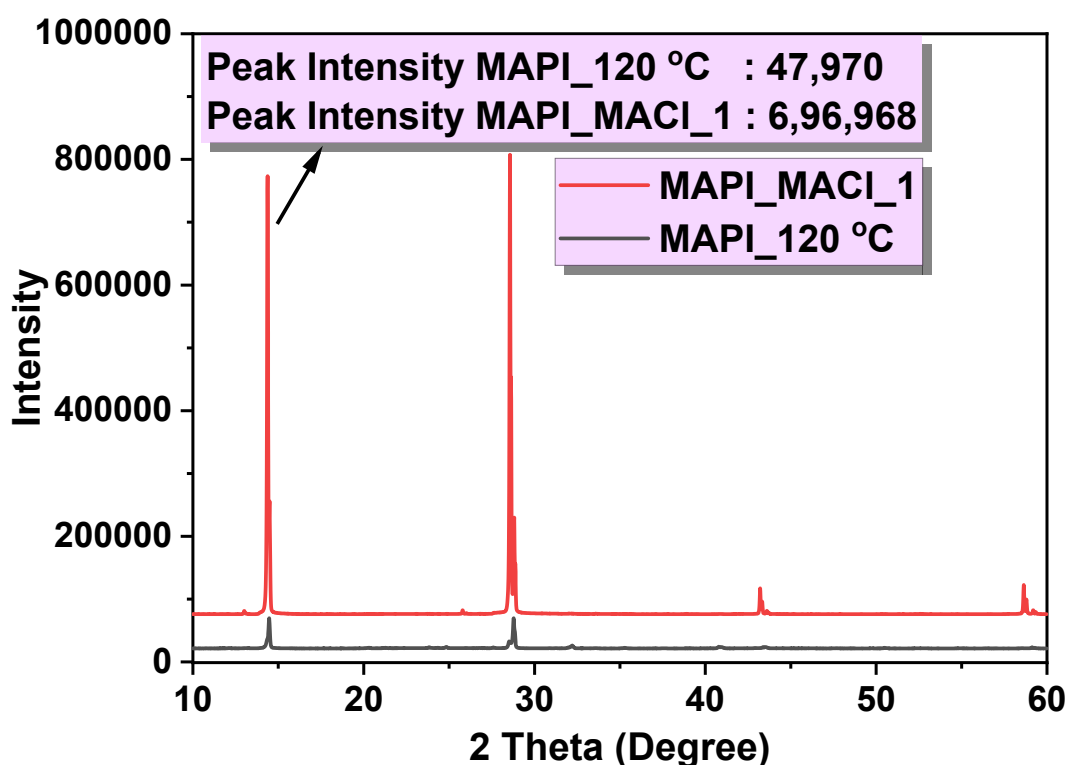

Figure S1. XRD spectra of MAPI\_MACI\_1 and MAPI\_120°C, diffraction peak (110) intensity comparison between both the samples.

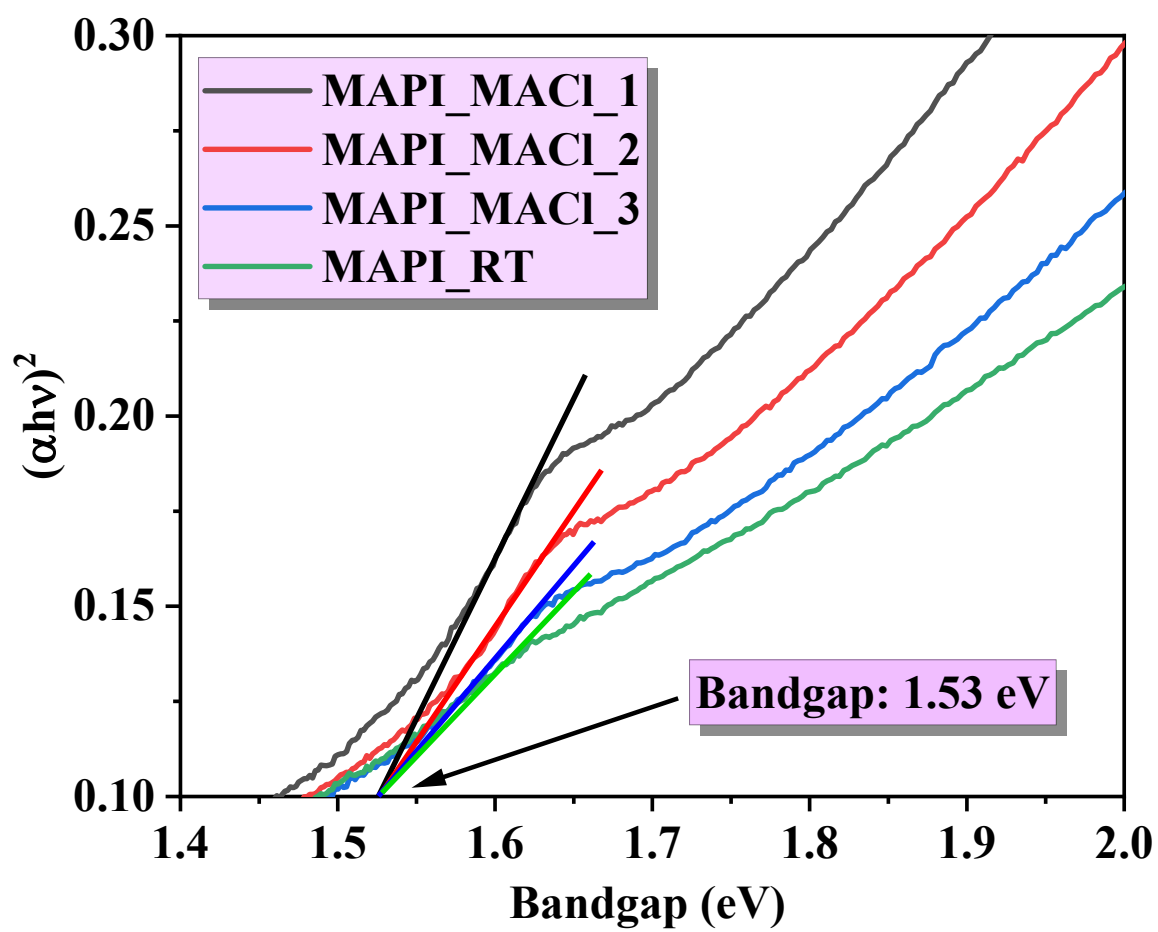

Figure S2. Tauc plot of all the prepared perovskite thin-films calculated using absorbance data.

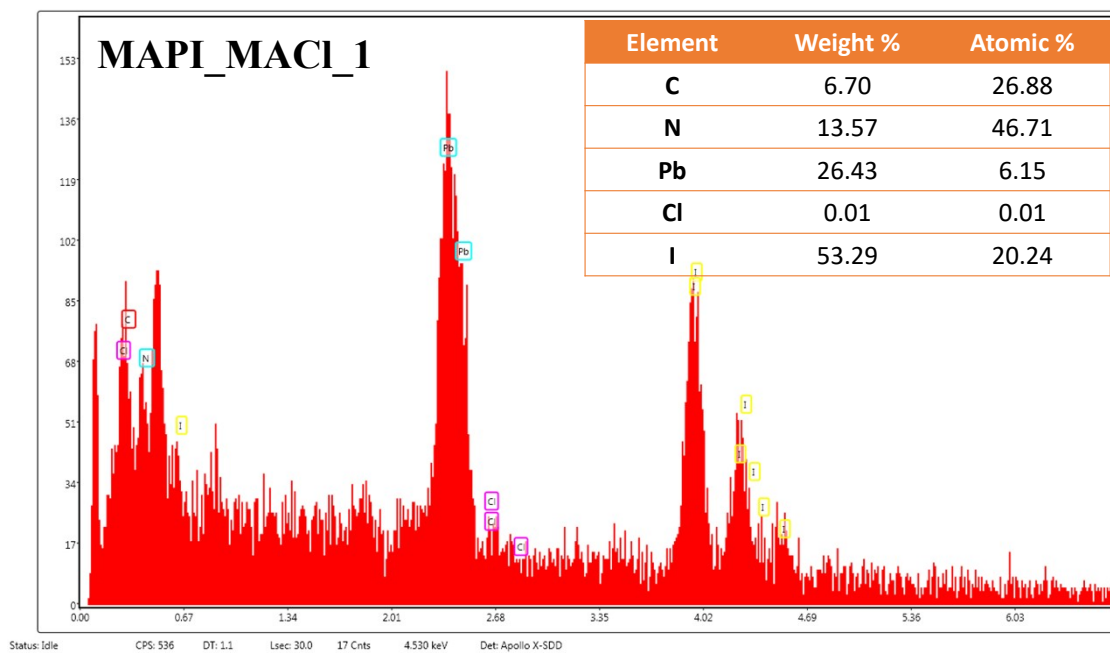

Figure S3. EDAX spectra of MAPI\_MaCl\_1.

Table S1. Calculated lifetime data of all the prepared perovskite thin-films.

| <b>Sample Name</b> | <b><math>\tau_1</math> (ns)</b> | <b><math>\tau_2</math> (ns)</b> |
|--------------------|---------------------------------|---------------------------------|
| <b>MAPI_120 °C</b> | 5.4                             | 139.9                           |
| <b>MAPI_MACI_1</b> | 9.6                             | 222.6                           |
| <b>MAPI_MACI_2</b> | 6.5                             | 152.6                           |
| <b>MAPI_MACI_3</b> | 6.0                             | 140.8                           |

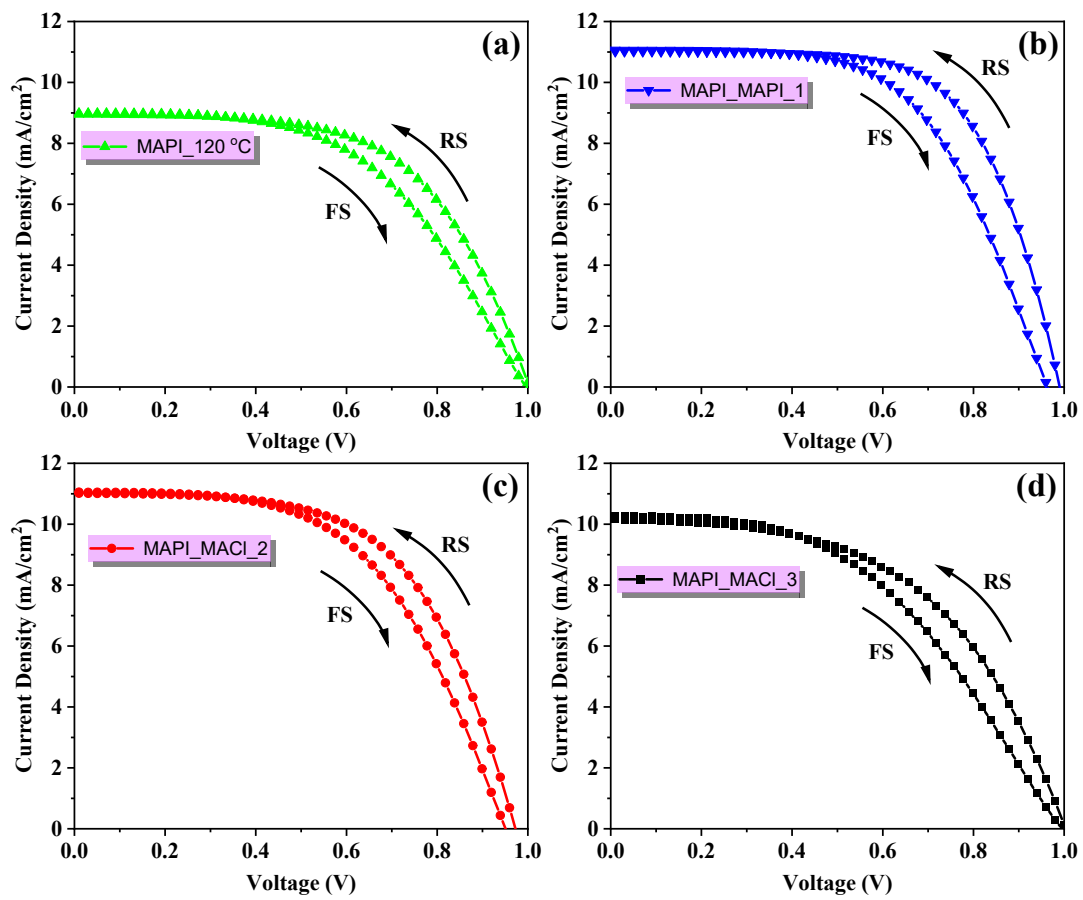

Figure S4. J-V spectra of all the devices with forward scan and reverse scan conditions.

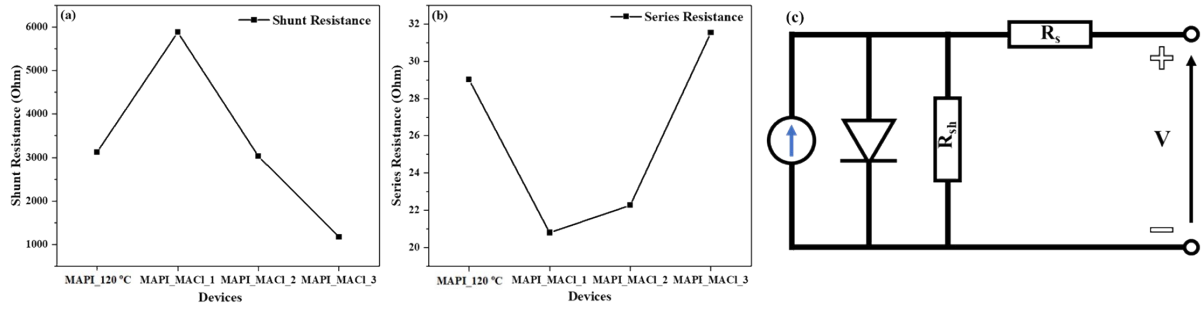

Figure S5. (a) Shunt resistance (b) series resistance of all the fabricated devices and (c) equivalent circuit diagram of perovskite solar cell device.

Table S2. Calculated values of series and shunt resistance for all the solar cell devices.

| Device             | Series Resistance ( $R_s$ ) ( $\Omega$ ) | Shunt Resistance ( $R_{sh}$ ) ( $\Omega$ ) |
|--------------------|------------------------------------------|--------------------------------------------|
| <b>MAPI_120 oC</b> | 29.02                                    | 3125.00                                    |
| <b>MAPI_MACI_1</b> | 20.80                                    | 5882.30                                    |
| <b>MAPI_MACI_2</b> | 22.27                                    | 3030.00                                    |
| <b>MAPI_MACI_3</b> | 31.54                                    | 1176.47                                    |
